# Supplementary material for: Cascade partial coalescence phenomena at electrolyte–oil interfaces and determination of bounds for the surface potential
Source: Royal Society of Chemistry journal article supplement (doi:10.1039/c3sm27772k), 2013-01-01
Supplement: c3sm27772k.pdf [file c3sm27772k.pdf]

## Electronic Supplementary Information

I. Movies of the cascade partial coalescence for toluene and n-heptane droplets in neutral pH water (`toluene_in_water.mp4` and `heptane_in_water.mp4`) and in 1M salt solutions (`toluene_in_1MKCl.mp4` and `heptane_in_1MKCl.mp4`). The corresponding length scales are given by the diameter  $d$  of the rising drop: 304  $\mu\text{m}$ , 316  $\mu\text{m}$ , 346  $\mu\text{m}$ , and 278  $\mu\text{m}$ , respectively. The movie-time corresponds to a slowing down of the real-time by a factor of 33.

II. Pictures of the sequence of drops undergoing partial-coalescence events, up to the final stable drop, at various heptol - water (Fig. 1), toluene - salt solution (Fig. 2), and n-heptane - salt solution (Fig. 3) interfaces, respectively.  $d$  denotes the diameter of the corresponding droplet.

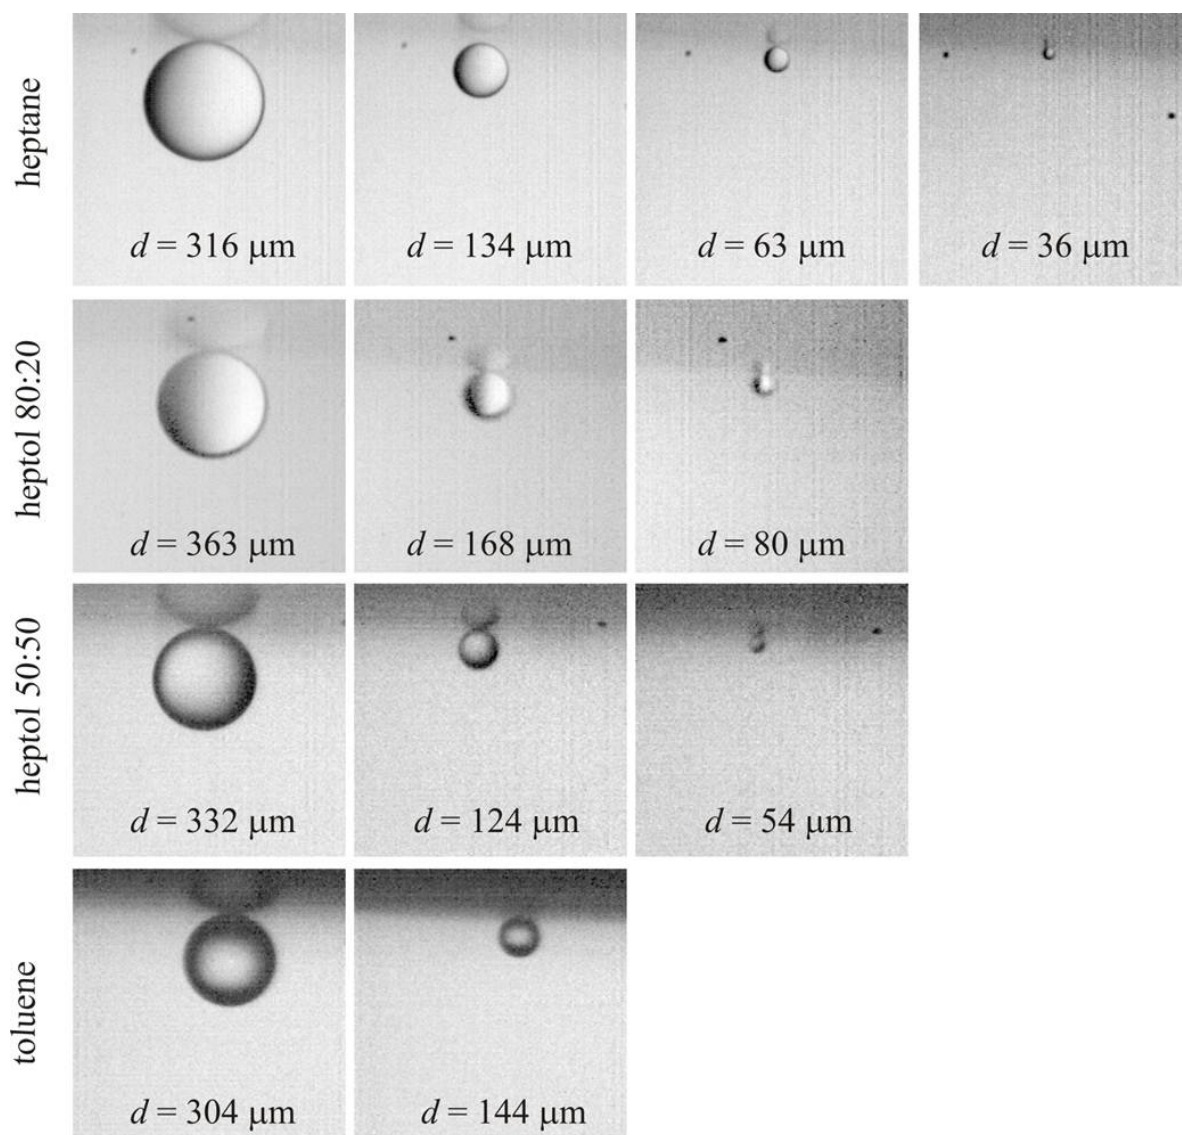

FIG. 1: The sequence of drops undergoing partial-coalescence events, up to the final stable drop, at various heptol - water interfaces.

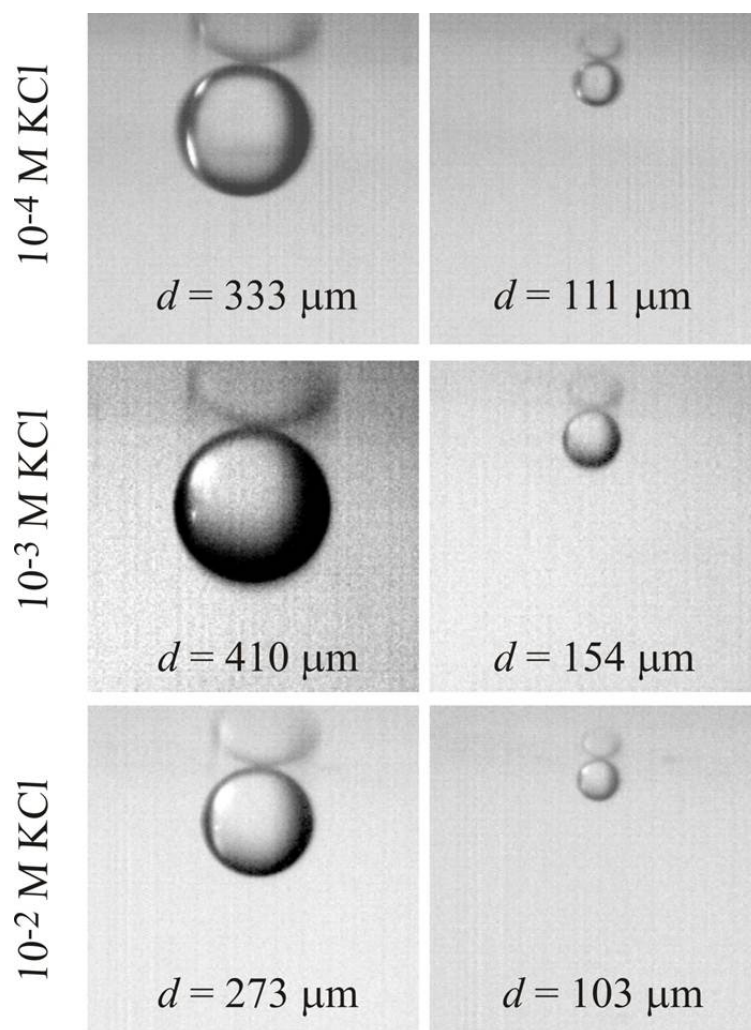

FIG. 2: The sequence of drops undergoing partial-coalescence events, up to the final stable drop, at various toluene - salt solution interfaces.

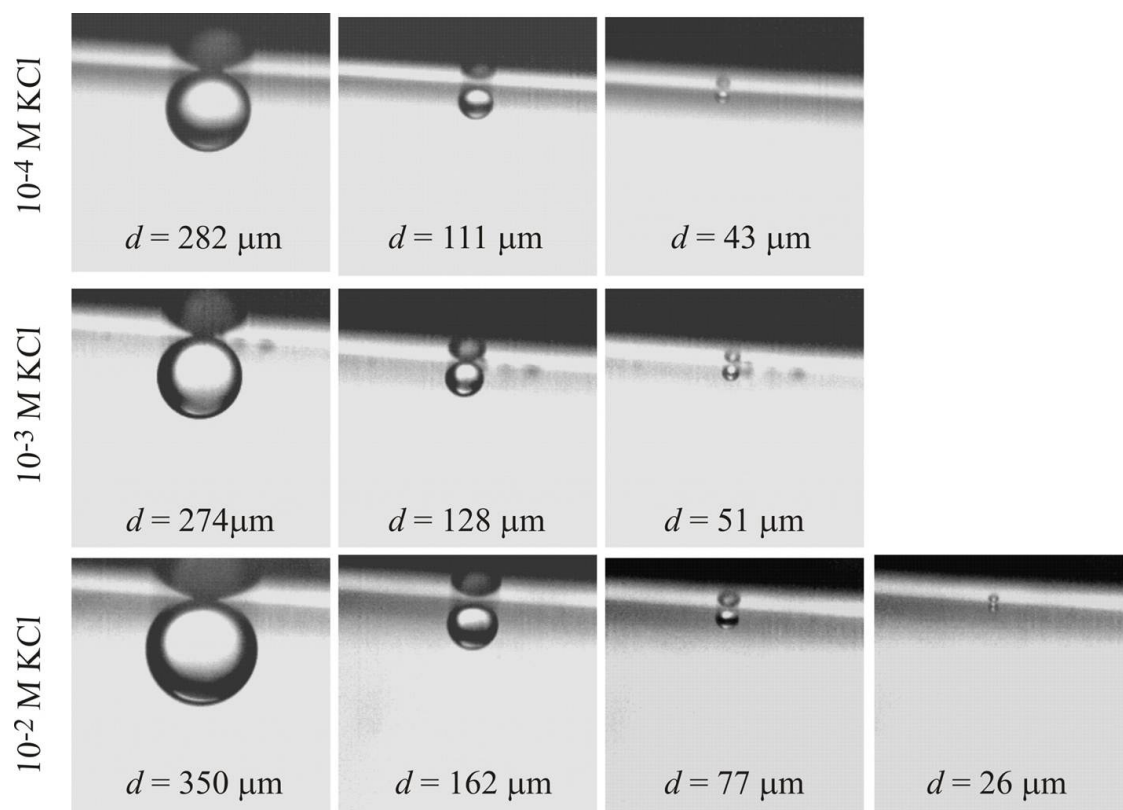

FIG. 3: The sequence of drops undergoing partial-coalescence events, up to the final stable drop, at various n-heptane - salt solution interfaces.
